# Supplementary material for: Outer membrane phospholipase A’s roles in Helicobacter pylori acid adaptation
Source: PubMed Central journal article supplement (PMC5469174; doi:10.1186/s13099-017-0184-y), 2017-06-12
Supplement: 13099_2017_184_MOESM2_ESM.pdf [file 13099_2017_184_MOESM2_ESM.pdf]

WP\_043955844\_1\_pir\_\_\_\_\_AVRGSIIANLLQEHDPFTLYPYDTNYVIYTDTSDLNKEAIRSYNWSNARKDEVKQLSLAFPLWRGILGPNVSVFGASYTQKSWWQLSNSAESPPFRETNYEPQLFLGFATDYEAFAGWTLRDVEVGFNHDSNGRSDPTSRSWNRITYRLMAQNGNWMVEVKPWYVVGSTDDNF  
CCJ87254\_1\_pir\_\_\_\_\_AVRGSIIANLLQEHDPFTLYPYESNYVLYTVTDDLNKEAIKSYDADNARKDEVKQLSLAFPFWRGIVGPNVSVLGASYTQKSWWQLSNSGQSSPFRETNYEPQLFLGFATDYQLAGWTLRDVEVGFNHQSNGRSDPTSRSWNRAYARLMAQNDNWLVEVKPWYVVGNTDDNF  
WP\_050556254\_1\_pir\_\_\_\_\_AVRGSIIANLLQEHDPFTLYPYESNYVLYTVTDDLNKEAIKSYDADNARKDEVKQLSLAFPFWRGIVGPNVSVLGASYTQKSWWQLSNSGQSSPFRETNYEPQLFLGFATDYQLAGWTLRDVEVGFNHQSNGRSDPTSRSWNRAYARLMAQNDNWLVEVKPWYVVGNTDDNF  
WP\_007717116\_1\_pir\_\_\_\_\_AVRGSIIANLLQEHDPFTLYPYESNYVLYTVTDDLNKEAIKSYDADNARKDEVKQLSLAFPFWRGIVGPNVSVLGASYTQKSWWQLSNSGQSSPFRETNYEPQLFLGFATDYQLAGWTLRDVEVGFNHQSNGRSDPTSRSWNRAYARLMAQNDNWLVEVKPWYVVGNTDDNF  
WP\_034588872\_1\_pir\_\_\_\_\_WELSPESKLGWNIIRSYQPVVYLPGFWTSKKNEFPSSPNERNTVTEQNLKSMESKQLSLKTAVENIFGDNGDLWVAYTQSSRWQVYNSSESRPFRETNYEPVSLVFRFTNYDLFLGDLNRMLGLTLNHQSNGRSDPLSRSWNRVMLNLGFERNNFALMLRPWYRFEdDNNF  
WP\_064718574\_1\_pir\_\_\_\_\_LVQGSIIISGLLQYDSPFVLYPYESNYIYTKTSDMNKEIASYDWDGKAKKDEVKQLSLAFPLWRGIAGENSVLAASYTQKSWWQLSNKKESSAPFRETNYEPQLFLGWVTDYRFAGWTLREIETGFNHESNGRSDPTSRSWNRVYARFMAQKGNFQLDLKPWYRFESdDNF  
WP\_037061332\_1\_pir\_\_\_\_\_WELAKDSKLGIFQLRAYKPVYALPAFWTSKPNLPHSPNPNNTATTPEALDAVEAKFQISFKTKLAEDVFGDNGDVWAGYTQSSRWQAYNSGISRPFRETNYEPEVMLVFRNNYSLFGWKGRMMGVGINHQSNGRSDPLSRSWNRVIFTAGLDRENWAFVVRPWYRISegdNNF  
WP\_013890942\_1\_pir\_\_\_\_\_PPRPKPKVNIILSDFAKKYLDIMEYRGTYFMPFYHSFTPIYQWYFPSINRYQSTEFKQVSRVVPVIRHFLFTTGLTYLAYTQTNWFQIYNNPQSAPMRMVNYMPELIYVYPLNIPFfmGRLSEFWIGWQHISNGIGGRqVSAGQRPVFKLTWQKGLKIRVAYWPYIPYNQSNF  
WP\_013890942\_1\_pir\_\_\_\_\_PPRPKPKVNIILSDFAKKYLDIMEYRGTYFMPFYHSFTPIYQWYFPSINRYQSTEFKQVSRVVPVIRHFLFTTGLTYLAYTQTNWFQIYNNPQSAPMRMVNYMPELIYVYPLNIPFfmGRLSEFWIGWQHISNGIGGRqVSAGQRPVFKLTWQKGLKIRVAYWPYIPYNQSNF  
WP\_057921372\_1\_pir\_\_\_\_\_WELAKDSKLGFLNFRAYKPVYLLPFWNSDPNELPHSPNPNRTVTEPQSLQSVQAKFQISFKTKAVENLFGDNGDVWLGTYQSSRWQVYNGDNRPFRETNYEPEAMLVFRNNYHIGGWSGRMAAIGLNLHQSNGRADPLSRSWNRVIGQVGLDRENWSIARPWWRigNDDNF  
WP\_056108275\_1\_pir\_\_\_\_\_WELAKDSKLGFLNFRAYKPVYLLPFWNSDPNELPHSPNPNRTVTEPQSLQSVQAKFQISFKTKAVENLFGDNGDVWLGTYQSSRWQVYNSDNSRPFRETNYEPEAMLVFRNNYHIGGWSGRMAAIGLNLHQSNGRADPLSRSWNRVIGQVGLDRENWSIARPWWRigNDDNF  
EGT71014\_1\_pir\_\_\_\_\_AVRGSIIANMLQEHDPFTLYPYDTNYLIYTDTSDLNKEIASYDWAENARKDEVKQLSLAFPLWRGILGPNVSVLGASYTQKSWWQLSNSSESSPFRETNYEPQLFLGFATDYRFAGWTLRDVEVGFNHDSNGRSDPTSRSWNRLYTRLMAENGNWLVEVKPWYVVGNTDDNF  
SFZ71754\_1\_pir\_\_\_\_\_PPKPKPKVNIILSDFAKKYLDIMEYRGTYFMPFYHSFTPIYQWYFPSINRYQSTEFKQVSRVVPVIRHFLFTTGLTYLAYTQTNWFQIYNNPQSAPMRMVNYMPELIYVYPLNIPFfmGRLSEFWIGWQHISNGIGGRqVSAGQRPVFKLTWQKGLKIRVAYWPYIPYNQSNF  
WP\_066749822\_1\_pir\_\_\_\_\_LVQGSIIISGLLQYDSPFVLYPYESNYIYTKTSDMNKEIASYDWDGKAKKDEVKQLSLAFPLWRGIAGENSVLAASYTQKSWWQFSNKKESSPFRETNYEPQLFLGFATDYQFAGWTLREIETGLNHESNGRSDPTSRSWNRVYARFMAQKGNFQLDLKPWYRFESdDNF  
AIJ08337\_1\_pir\_\_\_\_\_SDNEGVIANMLRHYDNPFTLYPYSTNYVLYTQTSDLNKEAISSYDWDQAKKNEIKFQISLAFPIWRGIAGDNSVLGAAYTQKSWWQAFNRSESSPFRETNYEPRLFLGWATDYPLfgWVLRDIEAGGVHQSNGRSDPTSRSWNRVYTRFLAQNGNFQVQLMPWYRIPekDDNF  
WP\_040078115\_1\_pir\_\_\_\_\_AVRGSIIANLLQEHDPFTLYPYDTNYLLYTTSDLNKEAIKTYSDNARKDEVKQLSLAFPFWRGILGPNVSVLGASYTQKSWWQLSNSGESSPFRETNYEPQLFLGFATDYEAFAGWTLRDVEVGFYNHDSNGRSDPTSRSWNRLYTRLAAQNGNWLVEVKPWYVVGDTDDNF  
WP\_007671108\_1\_pir\_\_\_\_\_AVRGSIIANLLQEHDPFTLYPYESNYLLYTVTDDLNKEAIKSYDWDNARKDEVKQLSLAFPFWRGILGPNVSVLGGSYTQKSWWQLSNSGQSSPFRETNYEPQLFLGFATDYELAGWTLRDVEVGFYNHQSNGRSDPTSRSWNRLYTRLMAQNDNWLMEVKPWYVIGDTDDNF  
WP\_028018183\_1\_pir\_\_\_\_\_AVHGSIIANLLQEHDPFTLYPYDTNYVIYTDTSDLNKEAISSYDWDNARKDEVKQLSLAFPFWRGILGPNVSVFGASYTQKSWWQLSNSGESSPFRETNYEPQLFLGFATDYEAFAGWTLRDVEVGFNHDSNGRSDPTSRSWNRAYTRLMAQNGNLMVEVKPWYVVGSTDDNF
